# Supplementary material for: Ultrasensitive determination of 39 parent and emerging halogenated polycyclic aromatic hydrocarbons in human serum
Source: Royal Society of Chemistry journal article supplement (doi:10.1039/d2ay00029f), 2022-01-01
Supplement: d2ay00029f1.pdf [file d2ay00029f1.pdf]

## Supplementary data

### Ultrasensitive determination of 39 parent and emerging halogenated polycyclic aromatic hydrocarbons in human serum

Chuxuan Zhao <sup>a, b</sup>, Chengxin Li <sup>a, b, c</sup>, Chu Wang <sup>a, b</sup>, Yingming Li <sup>a</sup>, Ruiqiang Yang <sup>a</sup>, Qinghua Zhang <sup>\* a, b, c</sup>, Guibin Jiang <sup>a, b</sup>

<sup>a</sup> State Key Laboratory of Environmental Chemistry and Ecotoxicology, Research Center for Eco-Environmental Sciences, Chinese Academy of Sciences, Beijing, 100085, China

<sup>b</sup> University of Chinese Academy of Sciences, Beijing, 100049, China

<sup>c</sup> School of Environment, Hangzhou Institute for Advanced Study, University of Chinese Academy of Sciences, Hangzhou, 310024, China

#### Number of Tables: 6.

Table S1. Abbreviation of 39 parent and halogenated polycyclic aromatic hydrocarbons.

Table S2. Age, gender and lipid information of the samples.

Table S3. QA/QC experiment parameters.

Table S4. Recoveries of HPAHs in different elution solvents for Supelclean™ LC-18.

Table S5. Effects of different concentrations and volumes of IPA on the recovery of standard substances in serum.

Table S6. Purification effects of different purification columns.

#### Number of Figure: 1.

Figure S1. Chromatograms of all analytes in the test of purification effect of real human serum samples.

**Table S1. Abbreviation of 39 parent and halogenated polycyclic aromatic hydrocarbons.**

| No. | HPAHs                                     | Abbreviation              | No. | PAHs                   | Abbreviation |
|-----|-------------------------------------------|---------------------------|-----|------------------------|--------------|
| 1   | 2-BromoFluorene                           | 2-Br-Fle                  | 24  | Naphthalene            | Nap          |
| 2   | 3-ChloroPhenanthrene                      | 3-Cl-Phe                  | 25  | Acenaphthylene         | Acy          |
| 3   | 9-ChloroPhenanthrene                      | 9-Cl-Phe                  | 26  | Acenaphthene           | Ace          |
| 4/5 | 9-ChloroAnthracene / 2-ChloroAnthracene   | 9-ClAnt / 2-ClAnt         | 27  | Fluorene               | Fle          |
| 6   | 3-BromoPhenanthrene                       | 3-Br-Phe                  | 28  | Phenanthrene           | Phe          |
| 7/8 | 9-BromoPhenanthrene / 2-BromoPhenanthrene | 9-Br-Phe / 2-Br-Phe       | 29  | Anthracene             | Ant          |
| 9   | 1-BromoAnthracene                         | 1-Br-Ant                  | 30  | Fluoranthene           | Flu          |
| 10  | 9-BromoAnthracene                         | 9-Br-Ant                  | 31  | Pyrene                 | Pyr          |
| 11  | 1,4-diChloroAnthracene                    | 1,4-Cl <sub>2</sub> -Ant  | 32  | Benz[a]anthracene      | BaA          |
| 12  | 9,10-diChloroAnthracene                   | 9,10-Cl <sub>2</sub> -Ant | 33  | Chrysene               | Chr          |
| 13  | 9,10-diChloroPhenanthrene                 | 9,10-Cl <sub>2</sub> -Phe | 34  | Benzo[b]fluoranthene   | BbF          |
| 14  | 1-ChloroPyrene                            | 1-Cl-Pyr                  | 35  | Benzo[k]fluoranthene   | BkF          |
| 15  | 3-BromoFluoranthene                       | 3-Br-Flu                  | 36  | Benzo[a]pyrene         | BaP          |
| 16  | 1,8-diBromoAnthracene                     | 1,8-Br <sub>2</sub> -Ant  | 37  | Indeno[1,2,3-cd]pyrene | InP          |
| 17  | 9,10-diBromoAnthracene                    | 9,10-Br <sub>2</sub> -Ant | 38  | Dibenz[a,h]anthracene  | DahA         |
| 18  | 4-BromoPyrene                             | 4-Br-Pyr                  | 39  | Benzo[ghi]perylene     | BghiP        |
| 19  | 9,10-diBromoPhenanthrene                  | 9,10-Br <sub>2</sub> -Phe |     |                        |              |
| 20  | 1-BromoPyrene                             | 1-Br-Pyr                  |     |                        |              |
| 21  | 7-ChloroBenz[a]anthracene                 | 7-Cl-BaA                  |     |                        |              |
| 22  | 7-BromoBenz[a]anthracene                  | 7-Br-BaA                  |     |                        |              |
| 23  | 6-ChloroBenzo[a]pyrene                    | 6-Cl-BaP                  |     |                        |              |

**Table S2. Age, gender and lipid information of the samples.**

| gender | Sample   | Age(y) | Age range (y) | Total lipid (g/L) |
|--------|----------|--------|---------------|-------------------|
| female | female-1 | 72     | 66-75         | 5.41              |
|        | female-2 | 70     | 66-75         | 5.46              |
|        | female-3 | 62     | 56-65         | 9.25              |
|        | female-4 | 59     | 56-65         | 8.29              |
|        | female-5 | 53     | 46-55         | 5.19              |
|        | female-6 | 46     | 46-55         | 4.93              |
|        | female-7 | 43     | 36-45         | 6.00              |
|        | female-8 | 40     | 36-45         | 5.31              |
| male   | male-1   | 69     | 66-75         | 5.84              |
|        | male-2   | 68     | 66-75         | 6.10              |
|        | male-3   | 61     | 56-65         | 7.32              |
|        | male-4   | 60     | 56-65         | 7.09              |
|        | male-5   | 53     | 46-55         | 5.64              |
|        | male-6   | 48     | 46-55         | 5.40              |
|        | male-7   | 39     | 36-45         | 4.67              |
|        | male-8   | 45     | 36-45         | 4.07              |

**Table S3. QA/QC experiment parameters.**

| <b>Compounds</b>          | <b>Linear range<br/>(ng/mL)</b> | <b>R<sup>2</sup></b> | <b>LOD<br/>(ng/mL)</b> | <b>LOQ<br/>(ng/mL)</b> | <b>MDL<br/>(ng/mL)</b> |
|---------------------------|---------------------------------|----------------------|------------------------|------------------------|------------------------|
| 2-Br-Fle                  | 0.1-100                         | 0.9999               | 0.005                  | 0.015                  | 0.005                  |
| 3-Cl-Phe                  | 0.1-100                         | 0.9992               | 0.002                  | 0.008                  | 0.004                  |
| 9-Cl-Phe                  | 0.1-100                         | 0.9993               | 0.002                  | 0.007                  | 0.141                  |
| 9-ClAnt / 2-ClAnt         | 0.1-100                         | 0.9998               | 0.001                  | 0.005                  | 0.003                  |
| 3-Br-Phe                  | 0.5-100                         | 0.9997               | 0.002                  | 0.006                  | 0.002                  |
| 9-Br-Phe / 2-Br-Phe       | 0.5-100                         | 0.9997               | 0.001                  | 0.004                  | 0.001                  |
| 1-Br-Ant                  | 0.5-100                         | 0.9994               | 0.002                  | 0.006                  | 0.002                  |
| 9-Br-Ant                  | 0.1-100                         | 0.9997               | 0.003                  | 0.011                  | 0.003                  |
| 1,4-Cl <sub>2</sub> -Ant  | 0.1-100                         | 0.9992               | 0.002                  | 0.005                  | 0.002                  |
| 9,10-Cl <sub>2</sub> -Ant | 0.1-100                         | 0.9998               | 0.001                  | 0.005                  | 0.001                  |
| 9,10-Cl <sub>2</sub> -Phe | 0.1-100                         | 0.9996               | 0.001                  | 0.003                  | 0.003                  |
| 1-Cl-Pyr                  | 0.1-100                         | 0.9998               | 0.001                  | 0.003                  | 0.002                  |
| 3-Br-Flu                  | 0.1-100                         | 0.9997               | 0.002                  | 0.006                  | 0.002                  |
| 1,8-Br <sub>2</sub> -Ant  | 0.1-100                         | 0.9997               | 0.002                  | 0.008                  | 0.002                  |
| 9,10-Br <sub>2</sub> -Ant | 0.1-100                         | 0.9997               | 0.002                  | 0.007                  | 0.002                  |
| 4-Br-Pyr                  | 0.1-100                         | 0.9997               | 0.001                  | 0.005                  | 0.001                  |
| 9,10-Br <sub>2</sub> -Phe | 0.1-100                         | 0.9998               | 0.002                  | 0.007                  | 0.002                  |
| 1-Br-Pyr                  | 0.1-100                         | 0.9999               | 0.001                  | 0.004                  | 0.001                  |
| 7-Cl-BaA                  | 0.1-100                         | 0.9997               | 0.001                  | 0.002                  | 0.001                  |
| 7-Br-BaA                  | 0.1-100                         | 0.9997               | 0.001                  | 0.003                  | 0.001                  |
| 6-Cl-BaP                  | 0.1-100                         | 0.9997               | 0.001                  | 0.003                  | 0.001                  |
| Nap                       | 0.5-200                         | 1.0000               | 0.001                  | 0.005                  | 4.650                  |
| Acy                       | 0.5-200                         | 0.9999               | 0.003                  | 0.009                  | 0.068                  |
| Ace                       | 0.5-200                         | 0.9999               | 0.008                  | 0.028                  | 0.324                  |
| Fle                       | 1-200                           | 0.9999               | 0.017                  | 0.057                  | 1.853                  |
| Phe                       | 0.5-200                         | 0.9999               | 0.014                  | 0.046                  | 2.099                  |
| Ant                       | 0.5-200                         | 0.9998               | 0.019                  | 0.063                  | 0.086                  |
| Flu                       | 0.5-200                         | 0.9998               | 0.005                  | 0.016                  | 0.128                  |
| Pyr                       | 0.5-200                         | 0.9999               | 0.004                  | 0.012                  | 0.073                  |
| BaA                       | 0.5-200                         | 0.9998               | 0.007                  | 0.023                  | 0.007                  |
| Chr                       | 0.5-200                         | 0.9999               | 0.008                  | 0.025                  | 0.008                  |
| BbF                       | 0.5-200                         | 0.9999               | 0.009                  | 0.029                  | 0.009                  |
| BkF                       | 0.5-200                         | 0.9999               | 0.008                  | 0.026                  | 0.008                  |
| BaP                       | 0.5-200                         | 0.9997               | 0.008                  | 0.025                  | 0.008                  |
| InP                       | 0.5-200                         | 0.9999               | 0.011                  | 0.035                  | 0.011                  |
| DahA                      | 0.5-200                         | 0.9994               | 0.007                  | 0.025                  | 0.007                  |
| BghiP                     | 0.5-200                         | 0.9998               | 0.007                  | 0.023                  | 0.007                  |

**Table S4. Recoveries of HPAHs in different elution solvents for Supelclean™ LC-18.**

| Compounds                 | DCM     |      | Hex: DCM-3:7 |     | Hex: DCM-1:1 |     |
|---------------------------|---------|------|--------------|-----|--------------|-----|
|                           | Average | RSD  | Average      | RSD | Average      | RSD |
| 2-Br-Fle                  | 91.9    | 1.6  | 83.8         | 1.0 | 78.3         | 3.7 |
| 3-Cl-Phe                  | 80.5    | 0.8  | 74.4         | 1.7 | 69.0         | 5.5 |
| 9-Cl-Phe                  | 88.4    | 1.8  | 81.9         | 1.4 | 76.4         | 2.4 |
| 9-ClAnt / 2-ClAnt         | 91.7    | 1.5  | 86.0         | 1.0 | 82.4         | 2.3 |
| 3-Br-Phe                  | 86.8    | 2.0  | 81.5         | 2.5 | 78.3         | 2.0 |
| 9-Br-Phe / 2-Br-Phe       | 88.1    | 2.4  | 83.1         | 2.3 | 78.7         | 2.4 |
| 1-Br-Ant                  | 94.9    | 1.1  | 90.9         | 1.9 | 89.6         | 2.9 |
| 9-Br-Ant                  | 105.7   | 2.7  | 103.4        | 1.7 | 100.1        | 3.2 |
| 1,4-Cl <sub>2</sub> -Ant  | 91.3    | 3.9  | 86.6         | 0.9 | 84.6         | 3.0 |
| 9,10-Cl <sub>2</sub> -Ant | 91.2    | 3.9  | 87.4         | 2.4 | 85.8         | 2.7 |
| 9,10-Cl <sub>2</sub> -Phe | 91.8    | 2.8  | 85.2         | 3.3 | 82.8         | 2.8 |
| 1-Cl-Pyr                  | 97.4    | 0.7  | 92.0         | 2.2 | 90.3         | 3.7 |
| 3-Br-Flu                  | 102.1   | 1.3  | 96.7         | 1.9 | 94.7         | 2.1 |
| 1,8-Br <sub>2</sub> -Ant  | 89.9    | 1.2  | 95.8         | 4.2 | 93.4         | 4.1 |
| 9,10-Br <sub>2</sub> -Ant | 80.9    | 4.8  | 93.3         | 4.0 | 90.8         | 1.0 |
| 4-Br-Pyr                  | 99.1    | 1.1  | 96.0         | 1.9 | 93.6         | 3.2 |
| 9,10-Br <sub>2</sub> -Phe | 102.6   | 0.8  | 98.5         | 1.9 | 96.0         | 1.6 |
| 1-Br-Pyr                  | 101.5   | 1.6  | 96.6         | 1.3 | 94.6         | 2.8 |
| 7-Cl-BaA                  | 98.0    | 1.2  | 94.8         | 2.2 | 94.2         | 2.7 |
| 7-Br-BaA                  | 104.0   | 0.3  | 106.4        | 1.7 | 104.2        | 1.5 |
| 6-Cl-BaP                  | 93.2    | 1.9  | 94.5         | 1.7 | 96.1         | 1.0 |
| Nap                       | 140.0   | 10.2 | 80.0         | 8.5 | 65.1         | 4.0 |
| Acy                       | 73.2    | 3.7  | 55.9         | 2.9 | 46.1         | 6.6 |
| Ace                       | 76.2    | 3.9  | 57.9         | 4.1 | 49.7         | 5.3 |
| Fle                       | 140.5   | 8.0  | 94.4         | 2.3 | 84.5         | 6.2 |
| Phe                       | 139.9   | 1.2  | 119.8        | 3.6 | 112.6        | 3.9 |
| Ant                       | 89.5    | 4.9  | 88.1         | 1.7 | 82.9         | 5.5 |
| Flu                       | 86.0    | 0.2  | 82.3         | 1.3 | 79.5         | 0.3 |
| Pyr                       | 85.6    | 0.4  | 83.1         | 0.6 | 80.4         | 0.8 |
| BaA                       | 94.4    | 1.2  | 95.7         | 0.9 | 94.7         | 0.2 |
| Chr                       | 85.2    | 8.0  | 88.7         | 0.5 | 87.5         | 0.3 |
| BbF                       | 81.3    | 3.2  | 81.1         | 1.3 | 80.2         | 0.2 |
| BkF                       | 75.7    | 2.4  | 76.3         | 0.3 | 75.7         | 0.0 |
| BaP                       | 80.1    | 3.8  | 81.9         | 0.6 | 81.9         | 0.7 |
| InP                       | 86.0    | 4.8  | 100.7        | 2.2 | 100.0        | 1.0 |
| DahA                      | 79.4    | 4.4  | 106.1        | 2.1 | 104.1        | 0.7 |
| BghiP                     | 70.5    | 4.6  | 99.8         | 1.5 | 98.8         | 0.2 |

**Table S5. Effects of different concentrations and volumes of IPA on the recovery of standard substances in serum.**

| Compounds                 | 2ml 3%IPA |      | 2ml 10%IPA |      | 1ml 20%IPA |      |
|---------------------------|-----------|------|------------|------|------------|------|
|                           | Average   | SD   | Average    | SD   | Average    | SD   |
| 2-Br-Fle                  | 59.2      | 1.3  | 75.3       | 12.4 | 58.0       | 8.9  |
| 3-Cl-Phe                  | 56.8      | 38.5 | 70.3       | 15.1 | 50.0       | 8.0  |
| 9-Cl-Phe                  | 53.0      | 3.0  | 66.9       | 9.1  | 52.7       | 8.3  |
| 9-ClAnt / 2-ClAnt         | -         | -    | 78.9       | 17.8 | 56.9       | 8.7  |
| 3-Br-Phe                  | -         | -    | 77.6       | 15.7 | 55.8       | 9.8  |
| 9-Br-Phe / 2-Br-Phe       | -         | -    | 77.6       | 17.2 | 54.2       | 9.6  |
| 1-Br-Ant                  | -         | -    | 85.0       | 17.9 | 68.1       | 5.2  |
| 9-Br-Ant                  | -         | -    | 86.1       | 12.1 | 69.4       | 9.6  |
| 1,4-Cl <sub>2</sub> -Ant  | -         | -    | 81.2       | 13.1 | 62.4       | 11.7 |
| 9,10-Cl <sub>2</sub> -Ant | -         | -    | 79.2       | 6.5  | 66.3       | 12.6 |
| 9,10-Cl <sub>2</sub> -Phe | -         | -    | 80.4       | 17.0 | 58.5       | 9.3  |
| 1-Cl-Pyr                  | -         | -    | 81.0       | 14.2 | 62.5       | 11.5 |
| 3-Br-Flu                  | 43.1      | 38.1 | 78.3       | 7.9  | 67.7       | 12.1 |
| 1,8-Br <sub>2</sub> -Ant  | 67.1      | 5.0  | 82.3       | 11.2 | 67.6       | 12.3 |
| 9,10-Br <sub>2</sub> -Ant | 61.7      | 5.5  | 78.7       | 13.0 | 61.9       | 12.5 |
| 4-Br-Pyr                  | 52.1      | 21.7 | 81.2       | 15.1 | 63.0       | 12.0 |
| 9,10-Br <sub>2</sub> -Phe | 72.8      | 26.6 | 81.1       | 13.8 | 64.5       | 11.6 |
| 1-Br-Pyr                  | 60.4      | 2.5  | 79.3       | 14.8 | 62.4       | 14.7 |
| 7-Cl-BaA                  | 71.1      | 1.9  | 82.7       | 11.9 | 66.2       | 11.9 |
| 7-Br-BaA                  | 74.7      | 4.5  | 79.1       | 14.4 | 68.6       | 12.2 |
| 6-Cl-BaP                  | 82.4      | 1.6  | 83.6       | 6.0  | 75.7       | 13.7 |
| Nap                       | 29.8      | 1.3  | 54.6       | 1.0  | 40.4       | 4.1  |
| Acy                       | 52.6      | 4.0  | 72.1       | 8.0  | 55.6       | 0.5  |
| Ace                       | 40.3      | 6.5  | 73.3       | 7.8  | 39.5       | 3.3  |
| Fle                       | 82.3      | 12.4 | 69.2       | 4.1  | 74.8       | 10.8 |
| Phe                       | -         | -    | 96.6       | 11.5 | 81.4       | 2.1  |
| Ant                       | -         | -    | 83.7       | 7.8  | 65.8       | 3.5  |
| Flu                       | 89.0      | 3.4  | 95.4       | 6.3  | 83.5       | 3.6  |
| Pyr                       | 56.7      | 2.6  | 78.8       | 3.2  | 53.5       | 5.2  |
| BaA                       | 87.9      | 8.0  | 109.2      | 3.0  | 85.7       | 6.3  |
| Chr                       | 71.7      | 2.9  | 104.3      | 4.5  | 80.7       | 6.5  |
| BbF                       | 81.6      | 2.9  | 95.6       | 6.2  | 80.3       | 7.0  |
| BkF                       | 80.3      | 2.5  | 94.1       | 8.2  | 79.0       | 7.0  |
| BaP                       | 81.7      | 1.1  | 86.4       | 3.5  | 81.5       | 8.5  |
| InP                       | 93.0      | 2.9  | 94.8       | 6.3  | 95.2       | 8.0  |
| DahA                      | 85.5      | 7.4  | 91.1       | 2.0  | 83.9       | 9.3  |
| BghiP                     | 84.0      | 23.1 | 90.5       | 1.7  | 100.0      | 11.0 |

**Table S6. Purification effects of different purification columns.**

| Compounds                 | Florisil |      | LC-Si   |      | silica gel |      | silica gel/alumina column |      |
|---------------------------|----------|------|---------|------|------------|------|---------------------------|------|
|                           | Average  | SD   | Average | SD   | Average    | SD   | Average                   | SD   |
| 2-Br-Fle                  | 59.1     | 11.0 | 65.7    | 3.6  | 62.3       | 8.5  | 83.2                      | 9.0  |
| 3-Cl-Phe                  | 53.2     | 9.9  | 58.8    | 4.6  | 62.4       | 6.9  | 78.9                      | 11.9 |
| 9-Cl-Phe                  | 55.2     | 10.6 | 61.1    | 4.7  | 68.6       | 5.4  | 79.1                      | 3.5  |
| 9-ClAnt / 2-ClAnt         | 59.6     | 10.8 | 65.8    | 4.9  | 73.7       | 6.6  | 89.4                      | 11.6 |
| 3-Br-Phe                  | 61.7     | 11.6 | 67.2    | 6.1  | 71.8       | 6.3  | 87.0                      | 9.8  |
| 9-Br-Phe / 2-Br-Phe       | 60.6     | 12.7 | 66.6    | 5.3  | 74.1       | 5.3  | 83.9                      | 8.1  |
| 1-Br-Ant                  | 67.4     | 13.8 | 74.5    | 6.4  | 81.7       | 5.7  | 100.0                     | 8.4  |
| 9-Br-Ant                  | 72.7     | 15.4 | 80.0    | 6.9  | 88.3       | 10.4 | 99.9                      | 8.1  |
| 1,4-Cl <sub>2</sub> -Ant  | 68.8     | 13.7 | 75.8    | 8.2  | 81.5       | 6.7  | 89.9                      | 2.2  |
| 9,10-Cl <sub>2</sub> -Ant | 72.8     | 14.8 | 79.5    | 7.8  | 84.1       | 2.0  | 94.7                      | 3.8  |
| 9,10-Cl <sub>2</sub> -Phe | 63.5     | 12.7 | 70.4    | 6.2  | 84.3       | 2.5  | 91.4                      | 10.5 |
| 1-Cl-Pyr                  | 67.1     | 13.4 | 74.3    | 6.5  | 92.0       | 0.0  | 94.6                      | 5.1  |
| 3-Br-Flu                  | 76.1     | 15.8 | 84.4    | 7.5  | 89.7       | 6.9  | 90.4                      | 0.4  |
| 1,8-Br <sub>2</sub> -Ant  | 78.3     | 16.5 | 87.0    | 7.8  | 89.3       | 10.6 | 96.4                      | 4.0  |
| 9,10-Br <sub>2</sub> -Ant | 67.3     | 13.3 | 74.6    | 6.8  | 77.8       | 5.3  | 92.2                      | 7.5  |
| 4-Br-Pyr                  | 70.7     | 14.5 | 78.5    | 7.0  | 92.3       | 2.2  | 98.9                      | 4.4  |
| 9,10-Br <sub>2</sub> -Phe | 76.1     | 16.5 | 83.5    | 8.3  | 93.2       | 10.0 | 96.2                      | 3.8  |
| 1-Br-Pyr                  | 70.1     | 14.0 | 78.6    | 7.7  | 92.6       | 2.7  | 93.7                      | 8.7  |
| 7-Cl-BaA                  | 74.6     | 15.4 | 81.4    | 8.0  | 96.6       | 2.8  | 96.1                      | 8.3  |
| 7-Br-BaA                  | 80.2     | 17.1 | 89.6    | 8.7  | 98.3       | 7.8  | 102.2                     | 1.1  |
| 6-Cl-BaP                  | 12.1     | 7.4  | 85.8    | 7.9  | 111.8      | 19.7 | 89.8                      | 3.5  |
| Nap                       | 53.1     | 6.4  | 46.4    | 4.8  | 73.8       | 0.8  | 81.7                      | 3.5  |
| Acy                       | 36.9     | 5.2  | 35.5    | 2.2  | 81.7       | 2.4  | 90.5                      | 4.2  |
| Ace                       | 41.9     | 4.8  | 40.1    | 4.3  | 82.9       | 2.5  | 91.5                      | 3.5  |
| Fle                       | 78.7     | 8.7  | 67.0    | 7.1  | 93.8       | 1.8  | 92.3                      | 3.9  |
| Phe                       | 102.8    | 9.9  | 100.2   | 6.8  | 98.3       | 1.1  | 93.8                      | 5.3  |
| Ant                       | 71.7     | 7.7  | 74.1    | 1.3  | 94.1       | 1.4  | 88.6                      | 4.9  |
| Flu                       | 75.2     | 1.6  | 74.3    | 3.4  | 91.4       | 2.3  | 85.8                      | 2.0  |
| Pyr                       | 75.0     | 2.2  | 74.9    | 4.0  | 104.3      | 2.3  | 105.4                     | 6.3  |
| BaA                       | 83.8     | 8.3  | 88.1    | 5.6  | 112.3      | 0.3  | 115.7                     | 7.9  |
| Chr                       | 77.6     | 7.8  | 81.2    | 5.9  | 105.7      | 5.0  | 109.2                     | 1.4  |
| BbF                       | 71.7     | 7.7  | 73.7    | 5.7  | 101.7      | 2.5  | 100.1                     | 0.4  |
| BkF                       | 67.4     | 7.0  | 69.1    | 5.3  | 102.7      | 2.6  | 97.4                      | 0.3  |
| BaP                       | 0.7      | 0.5  | 75.0    | 5.9  | 102.1      | 2.0  | 107.4                     | 0.0  |
| InP                       | 78.2     | 6.4  | 82.5    | 8.7  | 93.1       | 6.6  | 113.2                     | 1.8  |
| DahA                      | 83.3     | 9.6  | 83.1    | 12.9 | 103.1      | 5.5  | 123.7                     | 4.1  |
| BghiP                     | 28.8     | 11.6 | 85.4    | 5.3  | 93.3       | 3.8  | 103.0                     | 0.6  |

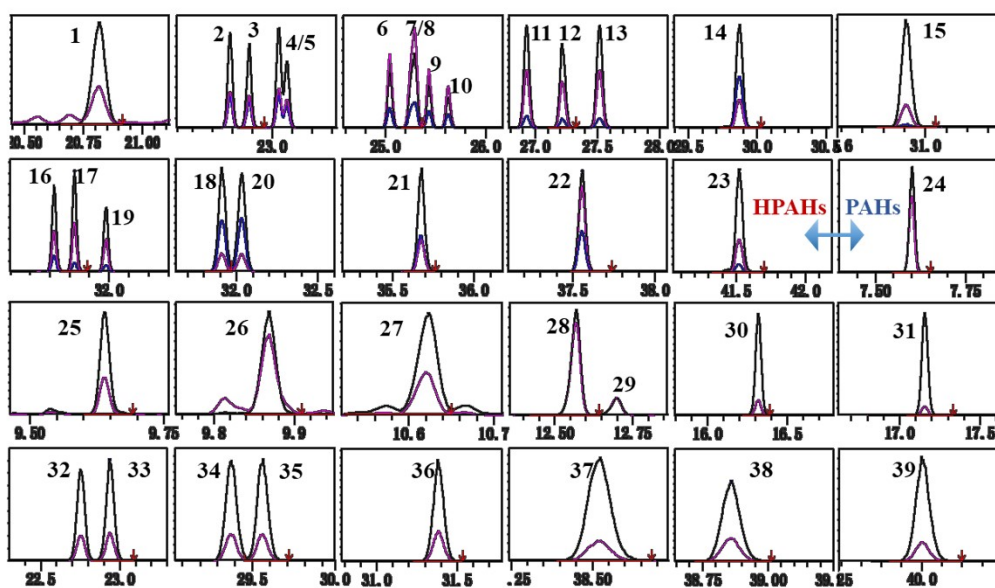

**Figure S1.** Chromatograms of all analytes in the test of purification effect of real human serum samples. The peak numbers and corresponding compounds were the same as those in Table 1 and Table S1.
